# Supplementary material for: Accelerating inhibitor discovery for deubiquitinating enzymes
Source: PubMed Central journal article supplement (PMC9908924; doi:10.1038/s41467-023-36246-0), 2023-02-08
Supplement: 41467_2023_36246_MOESM8_ESM.pdf [file 41467_2023_36246_MOESM8_ESM.pdf]

## Reporting Summary

Nature Portfolio wishes to improve the reproducibility of the work that we publish. This form provides structure for consistency and transparency in reporting. For further information on Nature Portfolio policies, see our [Editorial Policies](#) and the [Editorial Policy Checklist](#).

### Statistics

For all statistical analyses, confirm that the following items are present in the figure legend, table legend, main text, or Methods section.

| n/a                                 | Confirmed                                                                                                                                                                                                                                                                                      |
|-------------------------------------|------------------------------------------------------------------------------------------------------------------------------------------------------------------------------------------------------------------------------------------------------------------------------------------------|
| <input type="checkbox"/>            | <input checked="" type="checkbox"/> The exact sample size ( $n$ ) for each experimental group/condition, given as a discrete number and unit of measurement                                                                                                                                    |
| <input type="checkbox"/>            | <input checked="" type="checkbox"/> A statement on whether measurements were taken from distinct samples or whether the same sample was measured repeatedly                                                                                                                                    |
| <input type="checkbox"/>            | <input checked="" type="checkbox"/> The statistical test(s) used AND whether they are one- or two-sided<br><i>Only common tests should be described solely by name; describe more complex techniques in the Methods section.</i>                                                               |
| <input checked="" type="checkbox"/> | <input type="checkbox"/> A description of all covariates tested                                                                                                                                                                                                                                |
| <input checked="" type="checkbox"/> | <input type="checkbox"/> A description of any assumptions or corrections, such as tests of normality and adjustment for multiple comparisons                                                                                                                                                   |
| <input type="checkbox"/>            | <input checked="" type="checkbox"/> A full description of the statistical parameters including central tendency (e.g. means) or other basic estimates (e.g. regression coefficient) AND variation (e.g. standard deviation) or associated estimates of uncertainty (e.g. confidence intervals) |
| <input type="checkbox"/>            | <input checked="" type="checkbox"/> For null hypothesis testing, the test statistic (e.g. $F$ , $t$ , $r$ ) with confidence intervals, effect sizes, degrees of freedom and $P$ value noted<br><i>Give <math>P</math> values as exact values whenever suitable.</i>                            |
| <input checked="" type="checkbox"/> | <input type="checkbox"/> For Bayesian analysis, information on the choice of priors and Markov chain Monte Carlo settings                                                                                                                                                                      |
| <input checked="" type="checkbox"/> | <input type="checkbox"/> For hierarchical and complex designs, identification of the appropriate level for tests and full reporting of outcomes                                                                                                                                                |
| <input checked="" type="checkbox"/> | <input type="checkbox"/> Estimates of effect sizes (e.g. Cohen's $d$ , Pearson's $r$ ), indicating how they were calculated                                                                                                                                                                    |

*Our web collection on [statistics for biologists](#) contains articles on many of the points above.*

### Software and code

Policy information about [availability of computer code](#)

Data collection

Data analysis

For manuscripts utilizing custom algorithms or software that are central to the research but not yet described in published literature, software must be made available to editors and reviewers. We strongly encourage code deposition in a community repository (e.g. GitHub). See the Nature Portfolio [guidelines for submitting code & software](#) for further information.

### Data

Policy information about [availability of data](#)

All manuscripts must include a [data availability statement](#). This statement should provide the following information, where applicable:

- Accession codes, unique identifiers, or web links for publicly available datasets
- A description of any restrictions on data availability
- For clinical datasets or third party data, please ensure that the statement adheres to our [policy](#)

The native mass spectrometry data files associated with this study are available for free download from the MassIVE public repository using the accession: MSV000088637. Refseq can be accessed from [www.ncbi.nlm.nih.org/refseq/](http://www.ncbi.nlm.nih.org/refseq/). Additional source data are provided with this paper.

## Human research participants

Policy information about [studies involving human research participants and Sex and Gender in Research](#).

|                             |                                                             |
|-----------------------------|-------------------------------------------------------------|
| Reporting on sex and gender | <input type="text" value="No human research participants"/> |
| Population characteristics  | <input type="text" value="No human research participants"/> |
| Recruitment                 | <input type="text" value="No human research participants"/> |
| Ethics oversight            | <input type="text" value="No human research participants"/> |

Note that full information on the approval of the study protocol must also be provided in the manuscript.

## Field-specific reporting

Please select the one below that is the best fit for your research. If you are not sure, read the appropriate sections before making your selection.

Life sciences     Behavioural & social sciences     Ecological, evolutionary & environmental sciences

For a reference copy of the document with all sections, see [nature.com/documents/nr-reporting-summary-flat.pdf](https://www.nature.com/documents/nr-reporting-summary-flat.pdf)

## Life sciences study design

All studies must disclose on these points even when the disclosure is negative.

|                 |                                                                                                                                                                                                                                                                                                                                       |
|-----------------|---------------------------------------------------------------------------------------------------------------------------------------------------------------------------------------------------------------------------------------------------------------------------------------------------------------------------------------|
| Sample size     | <input type="text" value="For cell viability experiments, n&gt;3 biologically independent experiments were carried out to enable calculation of standard deviations. A total of n=25 ABPP primary screening assay runs were carried out so as to screen the entire library, each compound was screened once in the primary screen."/> |
| Data exclusions | <input type="text" value="Data was not excluded"/>                                                                                                                                                                                                                                                                                    |
| Replication     | <input type="text" value="Attempts at replication with 3-point dose response of 24 primary screen hits (n=1 biologically independent experiment), carried out independently of the original primary screen were successful."/>                                                                                                        |
| Randomization   | <input type="text" value="Randomization was not applicable to this study, as no studies on advanced organisms were performed."/>                                                                                                                                                                                                      |
| Blinding        | <input type="text" value="No blinding techniques were used in this study, experiments were carried out with labelled compounds."/>                                                                                                                                                                                                    |

## Reporting for specific materials, systems and methods

We require information from authors about some types of materials, experimental systems and methods used in many studies. Here, indicate whether each material, system or method listed is relevant to your study. If you are not sure if a list item applies to your research, read the appropriate section before selecting a response.

### Materials & experimental systems

|                                     |                                                           |
|-------------------------------------|-----------------------------------------------------------|
| n/a                                 | Involvement in the study                                  |
| <input type="checkbox"/>            | <input checked="" type="checkbox"/> Antibodies            |
| <input type="checkbox"/>            | <input checked="" type="checkbox"/> Eukaryotic cell lines |
| <input checked="" type="checkbox"/> | <input type="checkbox"/> Palaeontology and archaeology    |
| <input checked="" type="checkbox"/> | <input type="checkbox"/> Animals and other organisms      |
| <input checked="" type="checkbox"/> | <input type="checkbox"/> Clinical data                    |
| <input checked="" type="checkbox"/> | <input type="checkbox"/> Dual use research of concern     |

### Methods

|                                     |                                                 |
|-------------------------------------|-------------------------------------------------|
| n/a                                 | Involvement in the study                        |
| <input checked="" type="checkbox"/> | <input type="checkbox"/> ChIP-seq               |
| <input checked="" type="checkbox"/> | <input type="checkbox"/> Flow cytometry         |
| <input checked="" type="checkbox"/> | <input type="checkbox"/> MRI-based neuroimaging |

## Antibodies

|                 |                                                                                                                                                                                                                                                                                                                                                                                                                                                                                                                                                                |
|-----------------|----------------------------------------------------------------------------------------------------------------------------------------------------------------------------------------------------------------------------------------------------------------------------------------------------------------------------------------------------------------------------------------------------------------------------------------------------------------------------------------------------------------------------------------------------------------|
| Antibodies used | <input abp="" blot="" dub="" engagement"="" for="" in="" labeling="" methods."="" section="" target="" type="text" value="Described in SI 1: USP25 (ab187156) and USP28 (ab188240) antibodies were obtained from abcam. GAPDH (2118s, D4C6R), UCHL1 (13179S), UCHL3 (3525S), USP28 (4217S), USP7 (4833s) antibodies were obtained from Cell Signaling Technology. VCPIP1 (A302-933) and USP48 (A301-190A-M) antibodies were obtained from Bethyl Laboratories. Antibodies were used at 1:1000 dilution for primary blotting as described in the " western=""/> |
| Validation      | <input type="text" value="Statement from vendors:"/>                                                                                                                                                                                                                                                                                                                                                                                                                                                                                                           |

ab187156: Rabbit monoclonal [EPR15019] to USP25, reacts with mouse, rat, human  
 ab188240: Rabbit polyclonal to USP28, reacts with mouse, rat, human  
 GAPDH Cell Signaling Technology antibodies: GAPDH (D4C6R) Mouse mAb recognizes endogenous levels of total GAPDH protein. Species Reactivity: Human, Mouse, Rat, Monkey  
 13179S: UCHL1 (D3T2E) XP® Rabbit mAb recognizes endogenous levels of total UCHL1 protein. This antibody does not cross-react with other UCH family members. Species Reactivity: Human, Mouse, Rat, Monkey.  
 3525S: UCHL3 Antibody detects endogenous levels of total UCHL3 protein. Species Reactivity: Human, Mouse, Rat, Monkey.  
 4217S: USP28 Antibody detects transfected levels of USP28 protein. Species Reactivity: Human, Mouse  
 4833S: detects endogenous levels of total HAUSP protein. Species Reactivity: Human, Mouse, Rat, Monkey  
 A302-933: Antibody was affinity purified using an epitope specific to VCIP135 immobilized on solid support. The epitope recognized by A302-933A maps to a region between residue 1100 and 1150 of human Valosin-Containing Protein (p97)/p47 Complex-Interacting Protein p135 using the numbering given in entry NP\_079330.2 (GeneID 80124). Antibody concentration was determined by extinction coefficient: absorbance at 280 nm of 1.4 equals 1.0 mg of IgG. Verified Reactivity: Human  
 A301-190A-M: Antibody was affinity purified using an epitope specific to USP48 immobilized on solid support. The epitope recognized by A301-190A maps to a region between residue 985 and 1035 of human ubiquitin specific peptidase 48 using the numbering given in entry NP\_115612.4 (GeneID 84196). Immunoglobulin concentration was determined by extinction coefficient: absorbance at 280 nm of 1.4 equals 1.0 mg of IgG. Verified Reactivity: Mouse, Human

## Eukaryotic cell lines

Policy information about [cell lines and Sex and Gender in Research](#)

|                                                                      |                                                                |
|----------------------------------------------------------------------|----------------------------------------------------------------|
| Cell line source(s)                                                  | ATCC: HEK293T (CRL-3216), MCF7 (HTB-22)                        |
| Authentication                                                       | Cell lines were not separately authenticated                   |
| Mycoplasma contamination                                             | Not tested                                                     |
| Commonly misidentified lines<br>(See <a href="#">ICLAC</a> register) | Commonly misidentified cell lines were not used in this study. |
